# Supplementary material
Source: HighWire-hosted journal article supplement (https://ard.bmj.com/content/80/12/1584)
Supplement: inline-supplementary-material-4 [file inline-supplementary-material-4.xlsx]

## Sheet: Table 3
Gene name	ATAvsARA	ATAvsARA	ATAvsARA	ATAvsARA	ATAvsARA
	logFC	Average Expression	T score	P Value	Adjusted P Value
GSTT2B	1.521	6.013	2.835	0.014	0.099
CD177	1.498	4.127	2.195	0.047	0.136
AC233755.1	1.426	4.132	2.062	0.06	0.145
APLN	1.081	7.143	2.132	0.053	0.141
SORD2P	1.075	5.274	2.255	0.042	0.135
PRND	0.981	5.193	2.707	0.018	0.111
DDTL	0.936	3.127	2.533	0.025	0.12
LRRC37A17P	0.923	2.859	2.154	0.051	0.139
SPINK7	0.906	6.498	2.058	0.061	0.145
CDH4	0.884	5.749	2.358	0.035	0.135
SERPINB9P1	0.867	4.366	3.254	0.006	0.082
NPIPB15	0.841	5.469	2.112	0.055	0.141
SNORC	0.841	7.185	2.205	0.046	0.136
ACTA2-AS1	0.839	4.029	2.101	0.056	0.142
TEKT4P2	0.808	4.668	2.482	0.028	0.125
RPS26	0.797	8.497	2.247	0.043	0.135
AL031714.1	0.788	2.703	2.029	0.064	0.146
AC010761.2	0.787	4.537	3.016	0.01	0.089
FP565260.3	0.783	5.307	2.809	0.015	0.101
TNNT1	0.741	8.161	2.216	0.045	0.136
AACSP1	0.712	4.227	2.106	0.056	0.142
ANXA8	0.694	10.124	2.324	0.037	0.135
PSORS1C1	0.69	6.926	2.543	0.025	0.12
PCSK9	0.684	5.915	3.105	0.009	0.086
EEF1A2	0.682	7.41	2.621	0.021	0.12
ALDH3A1	0.665	10.228	2.309	0.038	0.135
MTCO1P40	0.662	5.303	2.563	0.024	0.12
SLC13A4	0.657	4.871	2.011	0.066	0.148
HOTAIR	0.655	6.956	2.852	0.014	0.099
KRT6A	0.653	12.127	2.038	0.063	0.145
AC145212.1	0.632	2.827	2.613	0.022	0.12
LIF	0.62	8.146	2.281	0.04	0.135
IL36B	0.619	6.876	2.33	0.037	0.135
ZBTB41	-0.585	7.331	-2.048	0.062	0.145
AP006222.1	-0.586	3.9	-2.705	0.018	0.111
THEMIS	-0.589	4.16	-2.54	0.025	0.12
LINC00632	-0.591	7.369	-2.227	0.045	0.136
PKHD1L1	-0.593	7.059	-2.344	0.036	0.135
SLC35E2A	-0.594	8.901	-2.038	0.063	0.145
ANGPT1	-0.594	6.767	-2.286	0.04	0.135
MSC-AS1	-0.595	6.237	-2.537	0.025	0.12
AQP7P1	-0.598	3.135	-2.141	0.052	0.139
ABCA6	-0.598	8.978	-2.241	0.043	0.135
CD226	-0.6	5.287	-2.305	0.039	0.135
SKIL	-0.601	8.393	-2.352	0.035	0.135
IL6ST	-0.603	11.617	-2.31	0.038	0.135
TRHDE	-0.604	4.675	-2.833	0.014	0.099
NEK7	-0.608	8.942	-2.087	0.057	0.143
FYB1	-0.609	7.859	-2.595	0.022	0.12
CACNA2D1	-0.61	8.017	-2.649	0.02	0.119
ANGPTL7	-0.61	7.094	-2.61	0.022	0.12
SLC5A3	-0.611	9.266	-2.275	0.041	0.135
SIX1	-0.612	5.42	-2.568	0.024	0.12
EDIL3	-0.613	8.831	-2.097	0.056	0.142
SLC40A1	-0.615	10.758	-2.339	0.036	0.135
GPRIN3	-0.615	7.437	-2.528	0.025	0.12
P2RY12	-0.615	4.741	-2.252	0.043	0.135
PCDH9	-0.622	5.538	-2.84	0.014	0.099
TMED5	-0.625	8.405	-2.33	0.037	0.135
XAF1	-0.625	9.001	-2.536	0.025	0.12
GBP5	-0.625	7.091	-2.307	0.038	0.135
ACSM5	-0.627	6.123	-2.897	0.013	0.099
IL7R	-0.627	7.615	-2.019	0.065	0.146
AUXG01000058.1	-0.627	7.361	-2.341	0.036	0.135
DOCK11	-0.63	8.878	-2.47	0.028	0.127
SH2D1A	-0.633	4.351	-2.119	0.054	0.141
DNM3OS	-0.635	7.054	-2.564	0.024	0.12
ITGA4	-0.638	7.6	-2.18	0.049	0.136
TM6SF1	-0.639	6.102	-3.01	0.01	0.089
F8A1	-0.639	6.904	-2.401	0.032	0.135
LINC00861	-0.643	3.886	-2.586	0.023	0.12
GALNT15	-0.644	8.926	-2.147	0.052	0.139
ENPP4	-0.645	7.064	-2.202	0.047	0.136
TMEM47	-0.649	8.389	-2.22	0.045	0.136
FP325317.1	-0.649	3.294	-2.904	0.012	0.099
RSAD2	-0.649	6.868	-2.189	0.048	0.136
KRTAP5-11	-0.661	2.673	-2.003	0.067	0.148
PTPRC	-0.661	9.596	-2.511	0.026	0.123
CD163	-0.662	11.063	-2.139	0.052	0.139
KLF15	-0.662	6.6	-2.396	0.033	0.135
TFEC	-0.662	5.408	-2.17	0.05	0.137
CBLN1	-0.663	4.856	-2.045	0.062	0.145
GHR	-0.67	8.571	-3.336	0.005	0.079
CCL24	-0.672	5.01	-2.024	0.064	0.146
SAMD9	-0.679	7.723	-2.88	0.013	0.099
CDO1	-0.684	6.911	-2.796	0.015	0.102
LMO3	-0.685	5.377	-2.505	0.027	0.123
TMEM170B	-0.686	6.972	-2.346	0.036	0.135
HSPB7	-0.687	8.739	-2.601	0.022	0.12
MYOC	-0.689	7.904	-2.041	0.062	0.145
FGF10	-0.702	4.773	-3.02	0.01	0.089
PLA2G16	-0.713	8.811	-3.421	0.005	0.071
TNFAIP6	-0.719	7.139	-2.057	0.061	0.145
CD69	-0.72	4.226	-2.994	0.011	0.089
KRTAP2-2	-0.721	2.769	-2.054	0.061	0.145
CALCRL	-0.725	8.026	-3.124	0.008	0.086
EVI2A	-0.726	5.166	-2.153	0.051	0.139
IDO1	-0.727	5.299	-2.125	0.054	0.141
LIFR	-0.73	9.794	-2.292	0.04	0.135
FCGR2C	-0.732	7.307	-2.401	0.032	0.135
LYZ	-0.735	11.558	-2.053	0.061	0.145
CCL19	-0.737	9.648	-2.095	0.057	0.142
CALB2	-0.742	7.328	-2.762	0.016	0.105
HLA-DRB6	-0.744	7.218	-2.684	0.019	0.113
MMD	-0.753	7.859	-3.014	0.01	0.089
GLYAT	-0.753	4.582	-2.413	0.032	0.135
CADM3	-0.756	9.588	-3.089	0.009	0.086
MKX	-0.757	5.382	-2.045	0.062	0.145
INHBA	-0.762	8.103	-2.351	0.035	0.135
NAT8L	-0.77	7.695	-2.459	0.029	0.128
FGF2	-0.771	7.314	-3.158	0.008	0.086
ABCD2	-0.771	4.522	-2.7	0.018	0.111
SLAMF8	-0.785	8.195	-2.085	0.058	0.143
FMO2	-0.787	7.865	-2.747	0.017	0.107
MME	-0.79	8.298	-2.592	0.023	0.12
36951	-0.807	6.84	-3.003	0.01	0.089
PLCXD3	-0.812	5.561	-2.259	0.042	0.135
KRTAP4-11	-0.818	2.576	-2.224	0.045	0.136
BTNL9	-0.829	8.564	-2.867	0.013	0.099
PENK	-0.849	6.054	-2.182	0.048	0.136
GZMK	-0.853	5.422	-3.193	0.007	0.086
TRHDE-AS1	-0.86	5.63	-2.877	0.013	0.099
ANGPTL8	-0.861	3.696	-2.294	0.039	0.135
PFKFB1	-0.875	5.205	-3.137	0.008	0.086
KRTAP4-8	-0.881	3.268	-2.005	0.067	0.148
AP001528.3	-0.893	6.066	-3.424	0.005	0.071
LVRN	-0.899	5.934	-3.95	0.002	0.047
HLA-DQA2	-0.91	8.778	-2.414	0.032	0.135
KRTAP4-2	-0.918	2.834	-2.275	0.041	0.135
HEPACAM	-0.929	5.262	-3.453	0.004	0.071
GYG2	-0.929	8.373	-3.114	0.008	0.086
G0S2	-0.933	8.912	-2.113	0.055	0.141
HRASLS5	-0.934	6.369	-3.896	0.002	0.047
AQP7	-0.934	8.083	-3.013	0.01	0.089
ADH1B	-0.942	11.513	-3.286	0.006	0.081
CD302	-0.943	9.201	-2.191	0.048	0.136
MLXIPL	-0.957	6.972	-3.866	0.002	0.047
KRT33B	-0.983	3.641	-2.166	0.05	0.137
CXCL11	-0.985	3.243	-2.171	0.049	0.137
SLC7A10	-0.987	4.36	-2.305	0.039	0.135
KRTAP4-6	-1.006	3.494	-2.117	0.054	0.141
MRAP	-1.01	4.922	-4.218	0.001	0.047
AC002546.1	-1.012	3.255	-3.738	0.003	0.052
KRTAP9-9	-1.013	3.144	-2.283	0.04	0.135
PRKAR2B	-1.017	8.321	-4.027	0.001	0.047
KCNIP2	-1.03	7.379	-3.215	0.007	0.086
MS4A1	-1.031	3.647	-2.546	0.025	0.12
KLB	-1.043	6.92	-4.343	0.001	0.047
IGF1	-1.046	8.484	-2.204	0.046	0.136
TIMD4	-1.064	5.074	-2.038	0.063	0.145
KRTAP4-12	-1.065	3.426	-2.354	0.035	0.135
AP000350.6	-1.068	5.814	-2.342	0.036	0.135
GPD1	-1.086	10.63	-3.856	0.002	0.047
GUCY1B2	-1.114	3.507	-2.191	0.048	0.136
KRTAP3-1	-1.128	3.969	-2.035	0.063	0.145
KRTAP1-3	-1.133	3.719	-2.267	0.041	0.135
HRK	-1.133	3.8	-4.101	0.001	0.047
LPL	-1.139	10.405	-3.817	0.002	0.047
CD36	-1.145	11.148	-4.353	0.001	0.047
KRTAP3-3	-1.15	3.817	-2.27	0.041	0.135
KRTAP4-9	-1.15	3.625	-2.334	0.037	0.135
KRTAP16-1	-1.169	4.146	-2.084	0.058	0.143
PPP1R1A	-1.17	8.016	-3.812	0.002	0.047
LIPE	-1.173	9.439	-3.521	0.004	0.065
PLIN4	-1.184	11.961	-3.324	0.006	0.079
LGALS12	-1.186	6.507	-4.028	0.001	0.047
KRT86	-1.211	4.975	-2.226	0.045	0.136
TIMP4	-1.222	7.28	-3.096	0.009	0.086
CIDEC	-1.223	9.193	-3.897	0.002	0.047
SAA1	-1.235	7.848	-2.318	0.038	0.135
RBP4	-1.243	8.963	-3.621	0.003	0.059
ACVR1C	-1.244	5.299	-3.906	0.002	0.047
KRTAP1-5	-1.253	4.381	-2.211	0.046	0.136
KRTAP9-3	-1.283	3.824	-2.418	0.031	0.135
PCK1	-1.295	6.796	-2.936	0.012	0.096
C14orf180	-1.303	6.205	-4.481	0.001	0.047
PLIN1	-1.32	11.077	-3.666	0.003	0.056
PDE3B	-1.334	6.71	-4.964	0	0.047
TRARG1	-1.337	8.324	-4.004	0.002	0.047
C6	-1.338	7.123	-3.28	0.006	0.081
GPAM	-1.36	9.674	-3.573	0.003	0.062
FABP4	-1.39	10.017	-4.196	0.001	0.047
LEP	-1.403	8.113	-2.975	0.011	0.091
TNFSF18	-1.463	4.969	-2.262	0.042	0.135
CXCL10	-1.541	5.455	-2.811	0.015	0.101
TPSD1	-1.639	5.841	-3.151	0.008	0.086
ADIPOQ	-1.641	10.989	-5.798	0	0.028
HORMAD1	-1.714	4.547	-3.983	0.002	0.047
CXCL9	-1.775	7.678	-2.494	0.027	0.124
CXCL13	-1.93	3.518	-2.779	0.016	0.103
PLA2G2D	-2.08	4.067	-2.644	0.02	0.119
